# Supplementary material for: Cervical cancer benefits from trabectedin combination with the β-blocker propranolol: in vitro and ex vivo evaluations in patient-derived organoids
Source: PubMed Central journal article supplement (PMC10294430; doi:10.3389/fcell.2023.1178316), 2023-06-13

## *Supplementary Material*

### **Cervical cancer benefits from Trabectedin combination with the $\beta$ -blocker Propranolol: in vitro and ex vivo evaluations in patients-derived organoids**

**Roberta Di Fonte<sup>1</sup>, Sabino Strippoli<sup>1</sup>, Marianna Garofoli<sup>1</sup>, Gennaro Cormio<sup>1</sup>, Simona Serrati<sup>1</sup>, Vera Loizzi<sup>1</sup>, Rossella Fasano<sup>1</sup>, Francesca Arezzo<sup>2</sup>, Mariateresa Volpicella<sup>3</sup>, Afshin Derakhshani<sup>4</sup>, Michele Guida<sup>1</sup>, Letizia Porcelli<sup>1+</sup> and Amalia Azzariti<sup>1+,\*</sup>**

<sup>1</sup> IRCCS Istituto Tumori “Giovanni Paolo II”, 70124 Bari, Italy

<sup>2</sup> Unit of Obstetrics and Gynecology, Department of interdisciplinary Medicine, Policlinico Hospital, “Aldo Moro” University of Bari, 70124 Bari, Italy

<sup>3</sup> Department of Biosciences, Biotechnologies and Biopharmaceutics, University of Bari, 70126 Bari, Italy

<sup>4</sup> Department of Microbiology, Immunology & Infectious Diseases, Cumming School of Medicine, University of Calgary, Calgary, Canada

<sup>+</sup> These authors contributed equally as senior authors

**\* Correspondence:**

Corresponding Author: Amalia Azzariti, [a.azzariti@oncologico.bari.it](mailto:a.azzariti@oncologico.bari.it); phone: +390805555986

Supplementary Figures

**Supplementary Figure 1: Cell target modulation by treatment(s) in OC and CC cell lines, in presence of 10  $\mu$ M NE.** (A) Immunoblots conducted in OV2008 cell line after 24 h of treatment(s). (B) Histogram plots showing COX-2 mRNA expression level (vs GAPDH mRNA expression level) measured after treatment(s) in HeLa, OV2008 and Caov-3 cell lines.

**A**

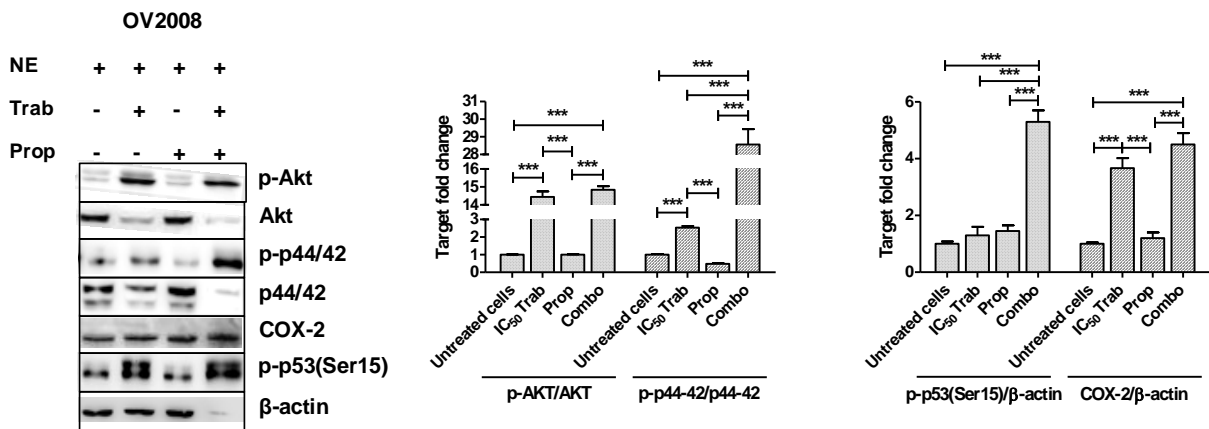

**B**

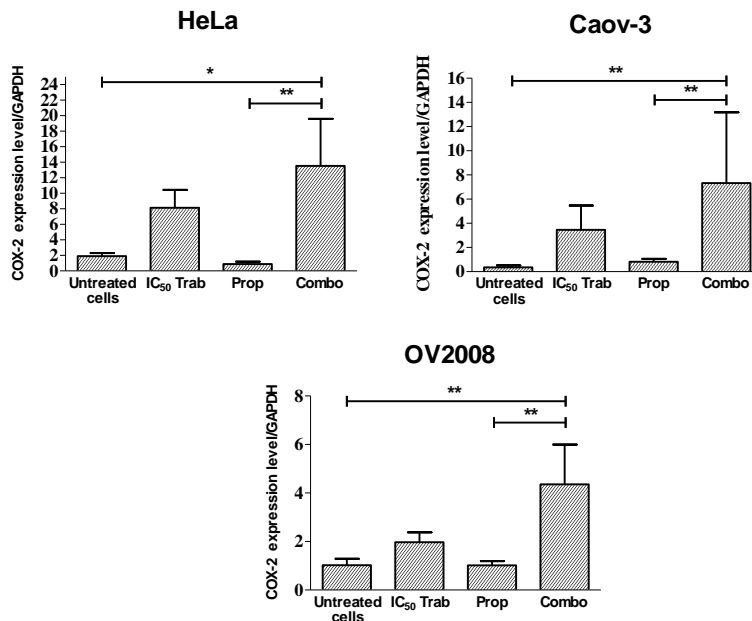

**Supplementary Figure 2: IF evaluation of p-p53(Ser15) and COX-2 in OV2008 cell line in untreated and treated cells.** Representative IF images showing p-p53(Ser15) and COX-2 localization in OV2008 cell lines after 24 h exposure to IC50 Trabectedin and Propranolol alone or in combination, in presence of 10  $\mu$ M NE.

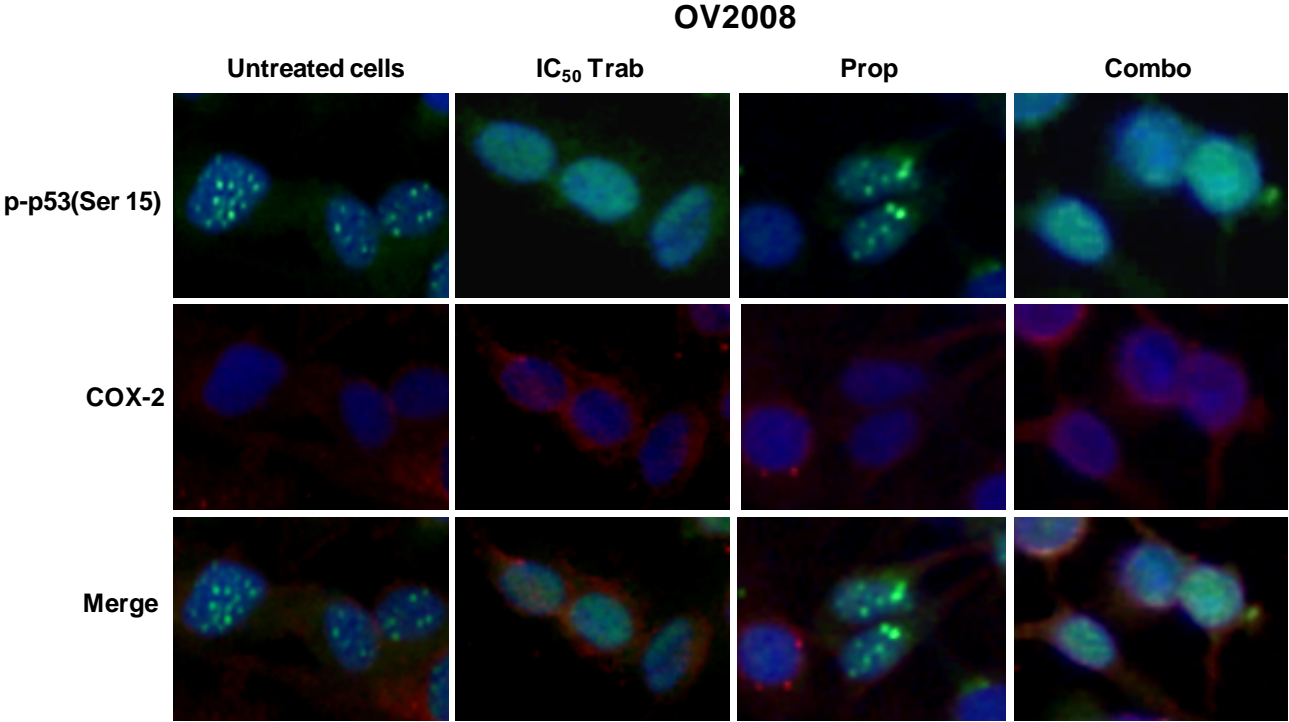

**Supplementary Figure 3: PD1 and PD-L1 expression modulation by treatment(s) in OC and CC cell line.** Histogram plots showing the expression (%) of PD-L1 (A) and PD1 (B) in OC and CC cell lines, performed by FCM in untreated and 24 h-treated cells with Trabectedin and Propranolol alone and in combination, under stress stimuli with 10  $\mu$ M NE; the results are reported as mean $\pm$ SD of three independent experiments. \*\* $p$ <0.01, \*\*\* $p$ <0.001.

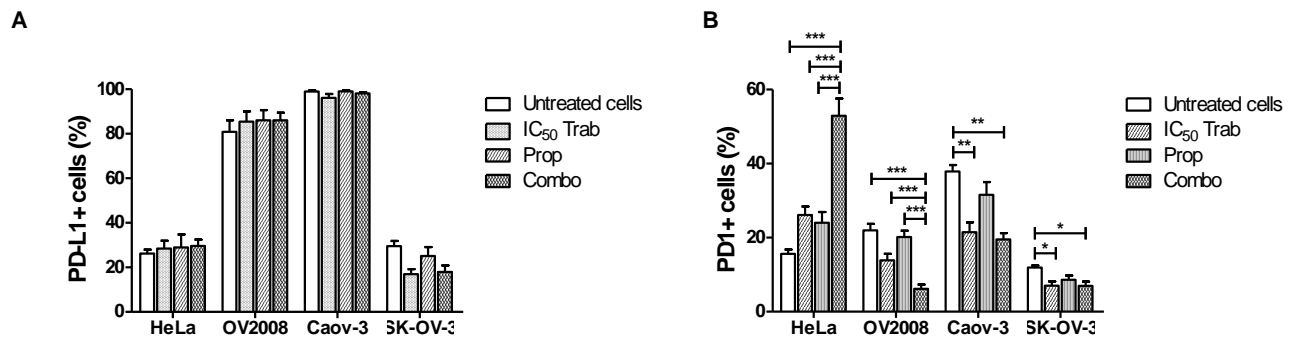

Supplement: Image1.pdf [file Image1.pdf]
